# Supplementary material
Source: PubMed Central journal article supplement (PMC9269655)
Supplement: CJN.16621221SupplementaryData.pdf [file CJN.16621221SupplementaryData.pdf]

## **Supplemental Material**

Supplemental Table 1. Community prevalence of variants and available inpatient treatments by time period.

Supplemental Table 2. Association of second-dose vaccination with severe Covid-19 outcomes in subgroups with SARS-CoV-2 infection.

Supplemental Table 3. Association of second-dose vaccination with severe Covid-19 outcomes in sensitivity analyses.

Supplemental Table 4. Characteristics of subgroup patients (N=1253) stratified by SARS-CoV-2 PCR status.

**Supplemental Table 1.** Community prevalence of variants and available inpatient treatments by time period.

| Time period               | Variant prevalence (%) |       |       | Treatments available for hospitalised patients |            |             |
|---------------------------|------------------------|-------|-------|------------------------------------------------|------------|-------------|
|                           | Alpha                  | Delta | Other | Dexamethasone                                  | Remdesivir | Tocilizumab |
| 1 (Dec 2020) <sup>a</sup> | -                      | -     | -     | ✓                                              |            |             |
| 2 (Jan 2021) <sup>b</sup> | 5                      | 20    | 75    | ✓                                              |            |             |
| 3 (Feb-Mar 2021)          | 69                     | 13    | 18    | ✓                                              |            | ✓           |
| 4 (Apr-July 2021)         | 28                     | 57    | 15    | ✓                                              | ✓          | ✓           |
| 5 (Aug 2021)              | 0                      | 96    | 4     | ✓                                              | ✓          | ✓           |
| 6 (Sept 2021)             | 0                      | 60    | 40    | ✓                                              | ✓          | ✓           |

<sup>a</sup>Data unavailable for December 2020

<sup>b</sup>Data based on small sample for January 2021

**Supplemental Table 2.** Association of second-dose vaccination with severe Covid-19 outcomes in subgroups with SARS-CoV-2 infection.

| Subgroup                | N <sup>a</sup> | Odds ratio (95%CI) for severe Covid-19 outcomes |             |                     |             |                          |             |                    |             |             |
|-------------------------|----------------|-------------------------------------------------|-------------|---------------------|-------------|--------------------------|-------------|--------------------|-------------|-------------|
|                         |                | Admission <sup>c</sup>                          |             | Oxygen <sup>d</sup> |             | Ventilation <sup>d</sup> |             | Death <sup>d</sup> |             |             |
| Age group               | 65-95 years    | 88                                              | <b>0.05</b> | (0.02-0.16)         | <b>0.06</b> | (0.02-0.22)              | <b>0.06</b> | (0.02-0.21)        | <b>0.04</b> | (0.01-0.17) |
|                         | 18-64 years    | 102                                             | 0.57        | (0.27-1.17)         | <b>0.34</b> | (0.15-0.78)              | 0.71        | (0.26-1.96)        | 0.53        | (0.16-1.80) |
| Vaccine type            | BNT162b2       | 79                                              | <b>0.26</b> | (0.13-0.53)         | <b>0.17</b> | (0.08-0.39)              | <b>0.18</b> | (0.07-0.49)        | <b>0.15</b> | (0.06-0.43) |
|                         | AZD1222        | 107                                             | <b>0.23</b> | (0.12-0.45)         | <b>0.19</b> | (0.09-0.40)              | <b>0.26</b> | (0.11-0.62)        | <b>0.10</b> | (0.03-0.30) |
| Time since <sup>b</sup> | 0-4 months     | 87                                              | <b>0.29</b> | (0.15-0.58)         | <b>0.25</b> | (0.11-0.53)              | <b>0.29</b> | (0.11-0.74)        | <b>0.15</b> | (0.05-0.52) |
|                         | 4-8 months     | 103                                             | <b>0.21</b> | (0.10-0.42)         | <b>0.13</b> | (0.06-0.29)              | <b>0.18</b> | (0.07-0.44)        | <b>0.11</b> | (0.04-0.30) |

Odds ratio (95% CI), including variables in Table 2, within subgroup comparing second-dose with no vaccination

Clinical outcomes are 'all cause', not specifically due to Covid-19

<sup>a</sup>Number of infections >10 days after second dose within subgroup

<sup>b</sup>Time since second dose

<sup>c</sup>Within 14 days of positive PCR

<sup>d</sup>Within 28 days of positive PCR

**Supplemental Table 3.** Association of second-dose vaccination with severe Covid-19 outcomes in sensitivity analyses.

| Condition                       | N <sup>a</sup> | Odds ratio (95%CI) for severe Covid-19 outcomes |             |                     |             |                          |             |                    |             |
|---------------------------------|----------------|-------------------------------------------------|-------------|---------------------|-------------|--------------------------|-------------|--------------------|-------------|
|                                 |                | Admission <sup>b</sup>                          |             | Oxygen <sup>c</sup> |             | Ventilation <sup>c</sup> |             | Death <sup>c</sup> |             |
| Prior SARS-CoV-2 excluded       | 178 / 1018     | <b>0.24</b>                                     | (0.13-0.44) | <b>0.17</b>         | (0.09-0.34) | <b>0.20</b>              | (0.09-0.43) | <b>0.12</b>        | (0.05-0.29) |
| Period 4 only (1 Apr - 31 July) | 62 / 29        | <b>0.21</b>                                     | (0.06-0.79) | 0.25                | (0.06-1.04) | 0.12                     | (0.01-1.26) | <b>0.00</b>        | (0.00-0.35) |
| Period 5 only (1 - 31 Aug)      | 71 / 17        | <b>0.11</b>                                     | (0.03-0.45) | <b>0.04</b>         | (0.01-0.22) | 0.16                     | (0.03-1.04) | <b>0.13</b>        | (0.02-0.93) |
| Period 6 only (1 - 26 Sept)     | 55 / 19        | <b>0.28</b>                                     | (0.08-0.99) | <b>0.23</b>         | (0.06-0.89) | 0.28                     | (0.07-1.15) | <b>0.22</b>        | (0.05-0.95) |

Odds ratio (95% CI), including variables in Table 2, comparing second-dose with no vaccination, under condition specified

Clinical outcomes are 'all cause', not specifically due to Covid-19

<sup>a</sup>Number of infections >10 days after second dose / number of infections in unvaccinated

<sup>b</sup>Within 14 days of positive PCR

<sup>c</sup>Within 28 days of positive PCR

**Supplemental Table 4.** Characteristics of subgroup patients (N=1253) stratified by SARS-CoV-2 PCR status.

|                                | PCR positive | PCR negative |
|--------------------------------|--------------|--------------|
| N                              | 272          | 981          |
| Age, median(IQR)               | 65 (56-74)   | 65 (55-75)   |
| Gender                         |              |              |
| Male                           | 162 (60)     | 588 (60)     |
| Ethnicity                      |              |              |
| Asian/other                    | 132 (49)     | 436 (44)     |
| Black                          | 67 (25)      | 261 (27)     |
| White                          | 73 (27)      | 284 (29)     |
| Diabetes                       | 117 (43)     | 419 (43)     |
| Prior SARS-CoV-2               | 11 (4)       | 236 (24)     |
| Vaccine <sup>a</sup>           |              |              |
| unvaccinated                   | 214 (79)     | 86 (9)       |
| >10d post 1 <sup>st</sup> dose | 25 (9)       | 30 (3)       |
| >10d post 2 <sup>nd</sup> dose | 33 (12)      | 865 (88)     |

Except where stated data are N (%)

<sup>a</sup>Status at positive PCR, or end of observation in those with negative PCR
